# Supplementary material
Source: MDPI journal article supplement (https://www.mdpi.com/2306-5729/8/6/108)
Supplement: s1 [file s1]

**Supplementary material 2:** The results of the questionnaire (severity level of earthquake damage) responded by the two groups of knowledgeable graduate students from the Department of Geography and Environmental Studies at the University of Haifa, who are well versed in the study of natural hazards and historical earthquake damage (referred to here as “semiskilled”). in January 2020 and January 2021. The columns labeled ‘q1’, ‘q2’ and so on, represent the questions presented to the respondents (Appendix 1). ‘Y’ in the ‘Exp’ field denote response who had experienced an earthquake in the past. The experts’ opinion appears at the bottom of the table.

| Response Id | q1(p) | q2  | q3   | q4  | q5  | q6  | q7(p) | q8  | q9  | q10 | q11 | q12(p) | q13 | q14 | q15 | q16 | q17  | q18(p) | Exp |
|-------------|-------|-----|------|-----|-----|-----|-------|-----|-----|-----|-----|--------|-----|-----|-----|-----|------|--------|-----|
| 1           | 6     | 5   | 8    | 7   | 7   | 6   | 8     | 4   | 6   | 6   | 4   | 10     | 4   | 6   | 8   | 7   | 9    | 9      |     |
| 2           | 1     | 4   | 6    | 8   | 8   | 7   | 7     | 10  | 9   | 6   | 5   | 9      | 6   | 5   | 8   | 6   | 10   | 8      | Y   |
| 3           | 5     | 6   | 8    | 5   | 7   | 5   | 7     | 4   | 7   | 6   | 5   | 10     | 2   | 6   | 6   | 3   | 5    | 8      |     |
| 4           | 7     | 7   | 9    | 9   | 6   | 10  | 9     | 3   | 7   | 8   | 9   | 10     | 6   | 6   | 10  | 7   | 9    | 9      | Y   |
| 5           | 7     | 7   | 9    | 8   | 7   | 10  | 8     | 6   | 8   | 7   | 7   | 10     | 7   | 7   | 8   | 7   | 8    | 9      |     |
| 6           | 7     | 6.5 | 10   | 12  | 6   | 6.5 | 11    | 4   | 8   | 5   | 6.5 | 7      | 3   | 7   | 11  | 10  | 12   | 11     |     |
| 7           | 8     | 7   | 8.5  | 10  | 6   | 11  | 9     | 7   | 8   | 6   | 8   | 10.5   | 7   | 7   | 11  | 8   | 10   | 9      | Y   |
| 8           | 7     | 7   | 12   | 10  | 7   | 8   | 6     | 6   | 8   | 7   | 7   | 10     | 5   | 4   | 7   | 6   | 7    | 7      | Y   |
| 9           | 6     | 6.5 | 9    | 12  | 7   | 6   | 12    | 2   | 7   | 4   | 6.5 | 9      | 4   | 8   | 10  | 12  | 10   |        |     |
| 10          | 7     | 10  | 9    | 9   | 8   | 8   | 9     | 7   | 8   | 7   | 6   | 10     | 6   | 6   | 10  | 8   | 8    | 9      | Y   |
| 11          | 7     | 7   | 8    | 8   | 7   | 7   | 9     | 7   | 8   | 7   | 6   | 10     | 6   | 6   | 9   | 7   | 8    | 9      |     |
| 12          | 7     | 6   | 8    | 9   | 6.5 | 10  | 8     | 5   | 8   | 7   | 8   | 10     | 6   | 7   | 10  | 7   | 7    | 8      | Y   |
| 13          | 8     | 8.5 | 10   | 8   | 9   | 9   | 9     | 7   | 9   | 8.5 | 9   | 10     | 8   | 7.5 | 10  | 8.5 | 10   | 8.5    |     |
| 14          | 2     | 4   | 7    | 7   | 5   | 9   | 8     | 3   | 6.5 | 5   | 6   | 11     | 2   | 4   | 11  | 7   | 8    | 9      |     |
| 15          | 3.5   | 3   | 10   | 8   | 3   | 11  | 7.5   | 2   | 6.5 | 3   | 10  | 12     | 2.5 | 3.5 | 11  | 3.5 | 5.5  | 7.5    |     |
| 16          | 8     | 5   | 7    | 7   | 5   | 7   | 6     | 4   | 5.5 | 5   | 6   | 9.5    | 3.5 | 4.5 | 7   | 5.5 | 6    | 7.5    |     |
| 17          | 8.5   | 7   | 8.5  | 9   | 7.5 | 8   | 9     | 7   | 7   | 8   | 7.5 | 9.5    | 7   | 7   | 8   | 7.5 | 9    | 9      |     |
| 18          | 8     | 7   | 8.5  | 7   | 6   | 7   | 8     | 5   | 8   | 7   | 7   | 9      | 7   | 7   | 9   | 7   | 8    | 9      |     |
| 19          | 8     | 6.5 | 9    | 12  | 6   | 11  | 7     | 5   | 8.5 | 8   | 9   | 11     | 6   | 6.5 | 12  | 7   | 11.5 | 9.5    | Y   |
| 20          | 6     | 5   | 7    | 7   | 6   | 6   | 7     | 6   | 7   | 7   | 6   | 8      | 7   | 6   | 7   | 7   | 8    | 8      | Y   |
| 21          | 6.5   | 3.5 | 10.5 | 9.5 | 5.5 | 6   | 8.5   | 6.5 | 8.5 | 6.5 | 7   | 10.5   | 7.5 | 6.5 | 9.5 | 6.5 | 7.5  | 10.5   |     |
| 22          | 7     | 6   | 8    | 11  | 6   | 7   | 10    | 5   | 11  | 10  | 9   | 11     | 6   | 6   | 7   | 8   | 9    | 8      | Y   |
| 23          | 7.5   | 6   | 11   | 10  | 6.5 | 8.5 | 7.5   | 4.5 | 7   | 6   | 7.5 | 10     | 6.5 | 6   | 10  | 7   | 7.5  | 7.5    |     |
| 24          | 6.5   | 5   | 11   | 11  | 5   | 9   | 8     | 6   | 8   | 7   | 7   | 11     | 5   | 6   | 9   | 8.5 | 9    | 10     | Y   |
| 25          | 6.5   | 7   | 6    | 7   | 7   | 7.5 | 8     | 6.5 | 7.5 | 6.5 | 5.5 | 8      | 6.5 | 5.5 | 6.5 | 7   | 7    | 7.5    | Y   |

|                  |     |     |     |     |     |     |     |     |     |     |     |    |     |     |      |     |     |      |   |
|------------------|-----|-----|-----|-----|-----|-----|-----|-----|-----|-----|-----|----|-----|-----|------|-----|-----|------|---|
| 26               | 6   | 3   | 8   | 9   | 3   |     | 6   | 3   | 7   | 5   | 8   | 10 | 2   | 3   | 10   | 5   | 7   | 9    |   |
| 27               | 8   | 7   | 11  | 9   | 8   | 10  | 8   | 3   | 7   | 8   | 7   | 12 | 7   | 6   | 8    | 7   | 9   | 11   |   |
| 28               | 7   | 6   | 11  | 10  | 8   | 8   | 9   | 6   | 8   | 8   | 9   | 11 | 6   | 6   | 9    | 7   | 9.5 | 9.5  |   |
| 29               | 5   | 4.5 | 8.5 | 6   | 7   | 5.5 | 7.5 | 3   | 8   | 4   | 4   | 8  | 3   | 5   | 6    | 5.5 | 4   | 7    |   |
| 30               | 6   | 6   | 10  | 8   | 5   | 8   | 7   | 4   | 7   | 7   | 7   | 12 | 6   | 6   | 9    | 7   | 7   | 11   |   |
| 31               | 6   | 6   | 9   | 8   | 6   | 6   | 7   | 4   | 6   | 7   | 7   | 12 | 7   | 7   | 11   | 7   | 7   | 11   | Y |
| 32               | 8   | 6.5 | 11  | 9   | 5   | 4   | 8.5 | 4.5 | 7.5 | 8   | 7   | 12 | 2.5 | 4   | 11.5 | 6   | 9.5 | 11.5 |   |
| 33               | 6   | 3   | 9   | 10  | 3   |     | 5   | 2   | 7   | 4   | 8   | 10 | 2   | 2   | 11   | 5   | 7   | 9    | Y |
| 34               | 8   | 6   | 11  | 9   | 8   | 11  | 10  | 7   | 6   | 8   | 6   | 12 | 5   | 6   | 11   | 9   | 10  | 10   | Y |
| 35               | 7   | 8   | 10  | 7   | 6   | 8   | 7   | 2   | 7   | 8   | 6   | 10 | 6   | 6   | 8    | 7   | 9   | 9    |   |
| 36               | 6   | 5   | 11  | 8   | 5   | 9   | 7   | 3.5 | 6   | 7   | 7   | 12 | 6   | 5   | 6.5  | 6   | 7   | 8    | Y |
| 37               | 4.5 | 3.5 | 8   | 3.5 | 6   |     | 4.5 | 4.5 | 5.5 | 5   | 5.5 | 6  | 7   | 5.5 | 7    | 5.5 | 7.5 | 4.5  |   |
| 38               | 6   | 6   | 9   | 6   | 6   | 6   | 6   | 6   | 8   | 6   | 7   | 8  | 6   | 6   | 7    | 6   | 6   | 8    |   |
| 39               | 7.5 | 6   | 11  | 10  | 8   | 9   | 8   | 4.5 | 8   | 5.5 | 6.5 | 11 | 4.5 | 5.5 | 10.5 | 7.5 | 10  | 10   | Y |
| 40               | 4.5 | 6   | 7   | 6.5 | 9   | 7   | 6   | 2   | 7   | 8   | 9   | 2  | 5   | 7   | 6    | 6   | 8   | 9    |   |
| 41               | 4   | 5   | 8   | 7   | 5   | 6   | 6   | 7   | 7   | 7   | 8   | 12 | 9   | 7   | 7    | 7   | 10  | 7    |   |
| 42               | 4   | 5   | 8   | 7   | 5   | 6   | 6   | 7   | 7   | 7   | 8   | 12 | 9   | 7   | 7    | 7   | 10  | 7    |   |
| 43               | 6.5 | 6.5 | 8   | 7   | 7   | 8   | 7.5 | 6   | 7.5 | 7.5 | 7   | 9  | 7   | 7   | 9    | 7   | 7.5 | 7.5  |   |
| 44               | 5   | 5   | 10  | 9   | 7   | 11  | 8   | 5   | 8   | 7   | 5   | 11 | 7   | 7   | 11   | 8   | 11  | 10   |   |
|                  |     |     |     |     |     |     |     |     |     |     |     |    |     |     |      |     |     |      |   |
| Experts' opinion | 8   | 6   | 9.5 | 8   | 6.5 | 9   | 8.5 | 5   | 7.5 | 7   | 8   | 10 | 5.5 | 6   | 9    | 7.5 | 7.5 | 8.5  | 8 |
