# Supplementary material
Source: MDPI journal article supplement (https://www.mdpi.com/2306-5729/8/6/108)
Supplement: s1 [file s1]

## Supplementary material 3: 1927 הערכת חומרת הנזק של רעידת האדמה ביריחו ב

רקע:

בסקר זה יוצגו בפניך קטעים היסטוריים ותמונות המתארים נזק שנגרם למספר מבנים כתוצאה מרעידת האדמה ביריחו בשנת 1927. עליך לקרוא את הקטעים ולעין בתמונות ולהעריך, עבור כל מקרה בנפרד, מהי לדעתך הדרגה של חומרת הנזק שנגרם. הערכת החומרה של הנזק תתבצע על בסיס סולם בין 12 דרגות שמתאר את חומרת הנזק בין 1 (לא הורגש כלל) ועד 12 (נזק חורבן מוחלט), כפי המתואר מטה.

אין תשובה 'נכונה' או 'לא נכונה' וזהו לא מבחן. הנך רשאי להפסיק את המענה בכל עת.

בשאלות או הערות לגבי המחקר ניתן לפנות אל: ד"ר מוטי זהר, החוג לגיאוגרפיה ולימודי סביבה, אוניברסיטת חיפה [mzohar@geo.haifa.ac.il](mailto:mzohar@geo.haifa.ac.il)

**תודה רבה על שיתוף הפעולה!**

הנחיות המענה לסקר:

1. קרא בבקשה את 12 דרגות החומרה של הנזק בטבלה מטה ואת הדוגמאות המצורפות.
2. השאלון מכיל קטעים ותמונות המתארים נזק שנגרם למספר מבנים בעקבות רעידת האדמה ב-1927.
3. אנא קרא את הקטעים או עיין בתמונות.
4. אנא שים לב לשם המבנה המוצג ומיקומו.
5. אנא שים לב למקור הדיווח והתאריך.
6. אנא קבע מהי לדעתך הדרגה של חומרת נזק המתאימה ביותר לנזק המוצג שתמונה או בקטע הכתוב.

כללים לקביעת הדרגה של חומרת הנזק:

| דרגה | הגדרה             | תיאור                                                                                                                                                                                                              |
|------|-------------------|--------------------------------------------------------------------------------------------------------------------------------------------------------------------------------------------------------------------|
| 1    | לא הורגשה כלל     | רעידת האדמה לא הורגשה במקום.                                                                                                                                                                                       |
| 2    | הורגשה בקושי      | הורגשה על ידי מספר קטן של אנשים ששהו בתוך הבתים במנוחה.                                                                                                                                                            |
| 3    | חלשה              | הורגשה בתוך מבנים על ידי מספר קטן של אנשים. אנשים במנוחה חשו תזוזה קלה.                                                                                                                                            |
| 4    | הורגשה באופן נרחב | הורגשה בתוך מבנים על ידי הרבה אנשים, ועל ידי מעט אנשים ששהו מחוץ למבנים. מעט אנשים התעוררו משינה. חלונות, דלתות וכלים בארונות – רעדו.                                                                              |
| 5    | חזקה              | הורגשה על ידי כל מי ששהה בתוך מבנה. מעטים ששהו בחוץ הרגישו. אנשים רבים שישנו בעת ההתרחשות- התעוררו. אנשים נבהלו. בניינים רעדו. חפצים תלויים התנדנדו בצורה משמעותית. חפצים קטנים זזו. דלתות וחלונות נפתחו או נטרקו. |

|    |             |                                                                                                                                                                                                                                               |
|----|-------------|-----------------------------------------------------------------------------------------------------------------------------------------------------------------------------------------------------------------------------------------------|
| 6  | נזק קל      | אנשים רבים נבהלו ורצו החוצה מתוך מבנים. חפצים נפלו. בתים רבים נפגעו באופן קל – ללא פגיעה במנה – ונראים סדקים דקים ונפילות של חלקים או ציפויים חיצוניים.                                                                                       |
| 7  | נזק משמעותי | רוב האנשים נבהלו ויצאו החוצה מתוך מבנים. רהיטים זזו ופריטים נפלו ממדפים במקומות רבים. לבניינים רבים נגרם נזק בינוני – סדקים קטנים בקירות, נפילות של חיפוי או ציפוי חיצוני, חלקים של ארובות נפלו ארצה. בבניינים ישנים נצפו סדקים גדולים בקירות |
| 8  | נזק כבד     | אנשים רבים חשו קושי לעמוד בעת הרעידה. קירות בבתיים רבים נסדקו. מעט בתים בנויים-היטב ניזוקו באופן משמעותי ובתים ישנים וחלשים יותר – התמוטטו                                                                                                    |
| 9  | הרס         | פאניקה כללית בקרב התושבים באיזור הרעידה. מבנים חלשים רבים – התמוטטו. גם בתים הבנויים-היטב ספגו נזק כבד: שבירת קירות ונזקים למבנה                                                                                                              |
| 10 | הרס כבד     | בתים רבים התמוטטו                                                                                                                                                                                                                             |
| 11 | חורבן       | רוב הבתים התמוטטו, גם בתים הבנויים לעמוד בפני רעידת אדמה – נהרסו                                                                                                                                                                              |
| 12 | חורבן מוחלט | כמעט כל הבתים נהרסו                                                                                                                                                                                                                           |

### דוגמאות

להלן מספר דוגמאות לנזקים שנגרמו למבנים כפי שתוארו בדיווחים היסטוריים ותמונות. שימו לב בבקשה למיקום ולמקור הדיווח, קראו את התיאור ולבסוף, שימו לב לדרגת החומרה של הנזק שקבע מומחה (מסומן באדום).

| חומרת נזק כפי שקבע מומחה | התיאור שהופיע בדיווח ההסטורי                                        | אזור התרחשות רעידת האדמה ומקור הדיווח                     |
|--------------------------|---------------------------------------------------------------------|-----------------------------------------------------------|
| <b>3-4</b>               | רעידת אדמה קלה הורגשה בשעה 15:30 בערך אתמול באלכסנדריה, שנמשכה כדקה | אלכסנדריה, מצרים<br>( Egyptian Gazette, )<br>(12.07.1927) |

|   |                                                                                                                                                                                                                                                                                                                                                                                                                                                                                                                                                                                                                                                                        |                                                                                         |
|---|------------------------------------------------------------------------------------------------------------------------------------------------------------------------------------------------------------------------------------------------------------------------------------------------------------------------------------------------------------------------------------------------------------------------------------------------------------------------------------------------------------------------------------------------------------------------------------------------------------------------------------------------------------------------|-----------------------------------------------------------------------------------------|
| 6 | <p>"מעטים הבתים שלא ניזוקו כלל. כעת נודע כי כיפת הסלע זועזעה באופן ניכר, והתיקונים הרבים מהשנים האחרונות ירדו לטמיון</p>                                                                                                                                                                                                                                                                                                                                                                                                                                                                                                                                               | <p><b>כיפת הסלע, ירושלים</b><br/>(London TIMES<br/>14.11.1927)</p>                      |
| 7 | <p>"... דוגמא טיפוסית לקושי היא הקירות שניזוקו באגף החדש של מבנה האוניברסיטה העברית על הר הצופים. הקירות האנכיים של הבניין נחצו בכל החלקים בין החלונות, הדלתות והפינות; הסדקים עברו דרך החיבורים (הנקודות החלשות) ובמקרים מסויימים, אבנים מסויימות התרסקו אף הן"</p> <p>length of the central wall. A typical example of such tension is the damaged walls in the new section of the Hebrew University building on Mt. Scopus (Fig. 4). The longitudinal walls of the building had split in all parts between the windows, doors and in the corners; the cracks traversed the joints (the weakest spots), and in some cases some stones were also smashed. Another</p> | <p><b>האוניברסיטה העברית, ירושלים</b><br/>(Report of the engineer Michaeli in 1928)</p> |
| 8 | <p>"בעמאן, הוא אמר, נזק רב נגרם. הוא ראה את החצי העליון של הצריח במסגד החדש מתרסק לאדמה כאילו שנחתך על ידי סכין"</p>                                                                                                                                                                                                                                                                                                                                                                                                                                                                                                                                                   | <p><b>צריח המסגד החדש בעמאן, ירדן</b><br/>(New York Times<br/>13.11.1927)</p>           |

9

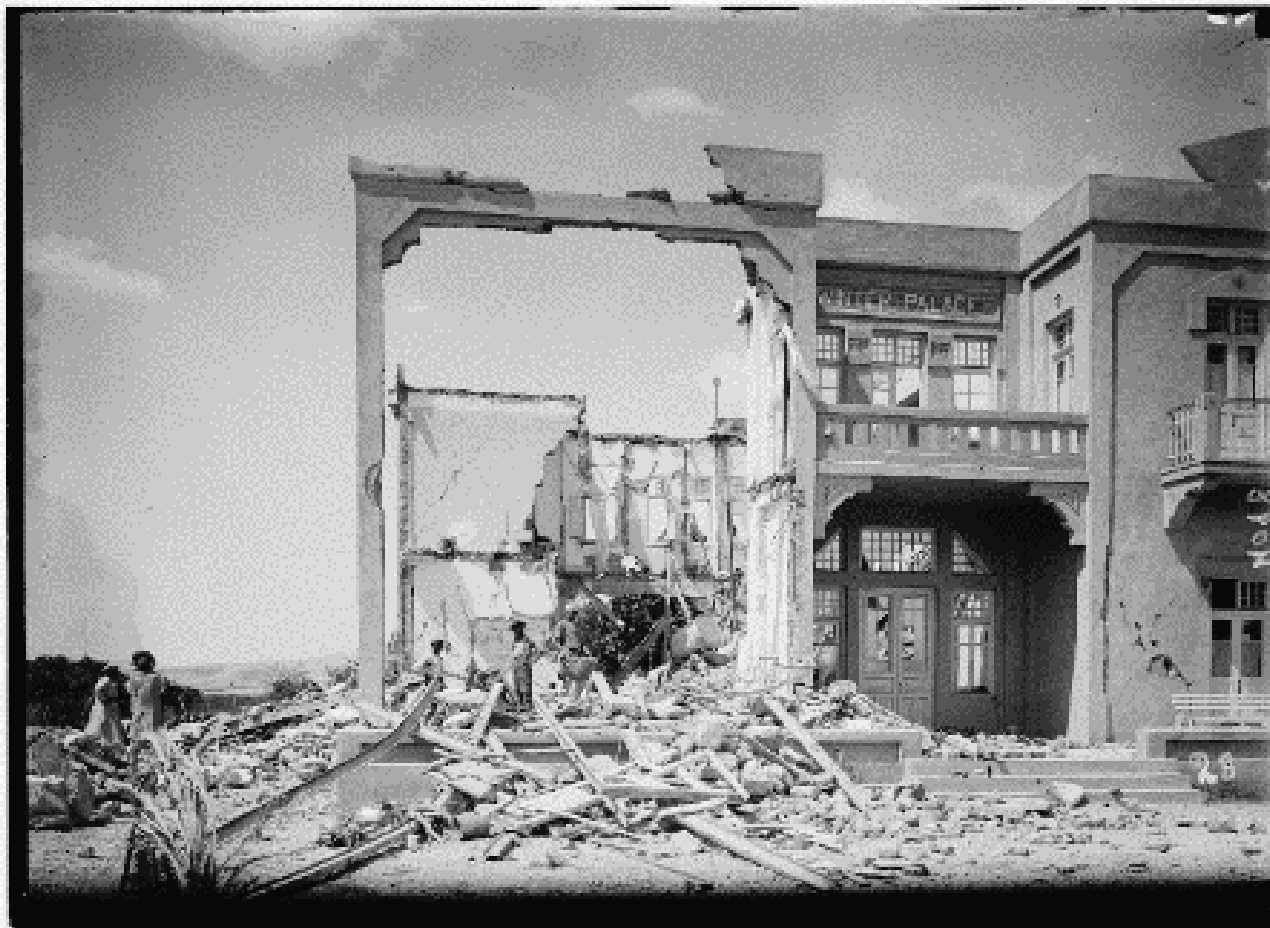

ארמון החורף, יריחו

Winter palace,

Jericho

(American colony  
photographers,  
1927)

## השאלון

### פרטים אישיים

גיל:

מגדר:

השכלה:

1. בי"ס יסודי
2. 12 שנות לימוד ללא בגרות
3. בגרות מלאה
4. השכלה על תיכונית לא אקדמית (הנדסאי / טכנאי)
5. תואר ראשון
6. תואר שני
7. תואר שלישי

האם חווית רעידת אדמה בעבר? כן / לא . אם כן: באיזו שנה התרחשה? \_\_\_\_\_ והיכן? \_\_\_\_\_

**בהמשך להוראות המפורטות מעלה, אנא ציין את דרגת עוצמת רעידת האדמה לדעתך המאפיינת כל תיאור נזק. אנא סמן מספר בין 1 ל-12. כמו כן, אנא ציין מדוע בחרת בדרגה זו.**

| התיאור ההיסטורי                                                                    | פרטי הדיווח                                                                                                              |
|------------------------------------------------------------------------------------|--------------------------------------------------------------------------------------------------------------------------|
|  | <p>מסגד וצריח על הר הזיתים</p> <p>Mosque and minaret on Olivet, Jerusalem</p> <p>American colony photographers, 1927</p> |

|                              |   |   |   |   |   |   |   |   |    |    |    |                                                            |
|------------------------------|---|---|---|---|---|---|---|---|----|----|----|------------------------------------------------------------|
| 1                            | 2 | 3 | 4 | 5 | 6 | 7 | 8 | 9 | 10 | 11 | 12 | אנא סמן מהי לדעתך דרגת החומרה של הנזק באירוע המתואר בתמונה |
| אנא ציין מדוע בחרת בדרגה זו? |   |   |   |   |   |   |   |   |    |    |    |                                                            |

מקרה 2:

| פרטי הדיווח | התיאור ההיסטורי                                        |
|-------------|--------------------------------------------------------|
| לא ידוע     | "מבנה הבניין ניזוק בצורה קשה, והוא קרוב לקריסה מוחלטת" |

|                              |   |   |   |   |   |   |   |   |    |    |    |                                                                     |
|------------------------------|---|---|---|---|---|---|---|---|----|----|----|---------------------------------------------------------------------|
| 1                            | 2 | 3 | 4 | 5 | 6 | 7 | 8 | 9 | 10 | 11 | 12 | אנא סמן מהי לדעתך דרגת עוצמת רעידת האדמה של האירוע<br>המתואר בתמונה |
| אנא ציין מדוע בחרת בדרגה זו? |   |   |   |   |   |   |   |   |    |    |    |                                                                     |

| פרטי הדיווח                                           | התיאור ההיסטורי                                                                                                                                                                                                                                                                                                                                                                                                                                                                                                                                                                                                               |
|-------------------------------------------------------|-------------------------------------------------------------------------------------------------------------------------------------------------------------------------------------------------------------------------------------------------------------------------------------------------------------------------------------------------------------------------------------------------------------------------------------------------------------------------------------------------------------------------------------------------------------------------------------------------------------------------------|
| מסגד עומאר, ירושלים<br>(דיווח המהנדס<br>מיכאלי, 1928) | <p>"סדק טיפוסי הוא זה החוצה את גובה שתי קומות הבנין הממוקם ליד החמאם (מרחצאות ציבוריים) קרוב לחצר הפנימית של מסגד עומאר. גם כאן, הסדק חוצה את הנקודה החלשה ביותר – החיבורים – וליד החור בחלק התחתון של הבנין"</p> <p>some cases some stones were also smashed. Another typical crack is the one traversing the height of two stories of a building situated near the „Hamâm” (public baths) close to the courtyard of the Mosque of Omar (Fig 5). Here too the crack had traversed the least resisting spot—the joints—and near the hole A in the lower part of the building. Another phase of the influence of the force</p> |

|                              |   |   |   |   |   |   |   |   |    |    |    |                                                                  |
|------------------------------|---|---|---|---|---|---|---|---|----|----|----|------------------------------------------------------------------|
| 1                            | 2 | 3 | 4 | 5 | 6 | 7 | 8 | 9 | 10 | 11 | 12 | אנא סמן מהי לדעתך דרגת עוצמת רעידת האדמה של האירוע המתואר בתמונה |
| אנא ציין מדוע בחרת בדרגה זו? |   |   |   |   |   |   |   |   |    |    |    |                                                                  |



| פרטי הדיווח                                                                              | התיאור ההיסטורי                                                                                                                                                                                                                                                                                                                                                                                     |
|------------------------------------------------------------------------------------------|-----------------------------------------------------------------------------------------------------------------------------------------------------------------------------------------------------------------------------------------------------------------------------------------------------------------------------------------------------------------------------------------------------|
| בניין השלטון, ירושלים<br>The government House, Jerusalem<br>(New York Times, 13.11.1927) | <p>"נזק משמעותי לבנין השלטון על הר הזיתים גרם להיותו בלתי ניתן לשיקום, והמגדל נמצא בסכנת התמוטטות. משרתת ממוצא רוסי נהרגה בתוך הבנין על ידי אבנים נופלות"</p> <p>rendered useless. Serious injury to the Government house on the Mount of Olives rendered it unfit for habitation, and the tower is in danger of collapse. A Russian maid servant was killed in the building by falling stones.</p> |

|                              |   |   |   |   |   |   |   |   |    |    |    |                                                                  |
|------------------------------|---|---|---|---|---|---|---|---|----|----|----|------------------------------------------------------------------|
| 1                            | 2 | 3 | 4 | 5 | 6 | 7 | 8 | 9 | 10 | 11 | 12 | אנא סמן מהי לדעתך דרגת עוצמת רעידת האדמה של האירוע המתואר בתמונה |
| אנא ציין מדוע בחרת בדרגה זו? |   |   |   |   |   |   |   |   |    |    |    |                                                                  |

מקרה 5:

| פרטי הדיווח                                                                          | התיאור ההיסטורי                                                                    |
|--------------------------------------------------------------------------------------|------------------------------------------------------------------------------------|
| <b>St. John's Convent at the Jordan,</b><br>(American colony photographers,<br>1927) |  |

|                              |   |   |   |   |   |   |   |   |    |    |    |                                                                     |
|------------------------------|---|---|---|---|---|---|---|---|----|----|----|---------------------------------------------------------------------|
| 1                            | 2 | 3 | 4 | 5 | 6 | 7 | 8 | 9 | 10 | 11 | 12 | אנא סמן מהי לדעתך דרגת עוצמת רעידת האדמה של האירוע<br>המתואר בתמונה |
| אנא ציין מדוע בחרת בדרגה זו? |   |   |   |   |   |   |   |   |    |    |    |                                                                     |

מקרה 6:

| התיאור ההיסטורי                                                                    | פרטי הדיווח      |
|------------------------------------------------------------------------------------|------------------|
|  | <p>אין פרטים</p> |

|                              |   |   |   |   |   |   |   |   |    |    |    |                                                                  |
|------------------------------|---|---|---|---|---|---|---|---|----|----|----|------------------------------------------------------------------|
| 1                            | 2 | 3 | 4 | 5 | 6 | 7 | 8 | 9 | 10 | 11 | 12 | אנא סמן מהי לדעתך דרגת עוצמת רעידת האדמה של האירוע המתואר בתמונה |
| אנא ציין מדוע בחרת בדרגה זו? |   |   |   |   |   |   |   |   |    |    |    |                                                                  |

מקרה 7:

| פרטי הדיווח                                                                                        | התיאור ההיסטורי                                                                                                                                                                                                                      |
|----------------------------------------------------------------------------------------------------|--------------------------------------------------------------------------------------------------------------------------------------------------------------------------------------------------------------------------------------|
| <p>הכנסייה בבית לחם</p> <p><b>The Basilica of Bethlehem</b></p> <p>(New York times 14.11.1927)</p> | <p>"בכנסייה בבית לחם ישנו סדק מול הדלת הארמנית ורבים מהקירות של המנזר הארמני"</p> <p><b>In the Basilica in Bethlehem there is a crack opposite the Armenian Door and many in the walls of the Armenian Convent. The Armenian</b></p> |

|                              |   |   |   |   |   |   |   |   |    |    |    |                                                                  |
|------------------------------|---|---|---|---|---|---|---|---|----|----|----|------------------------------------------------------------------|
| 1                            | 2 | 3 | 4 | 5 | 6 | 7 | 8 | 9 | 10 | 11 | 12 | אנא סמן מהי לדעתך דרגת עוצמת רעידת האדמה של האירוע המתואר בתמונה |
| אנא ציין מדוע בחרת בדרגה זו? |   |   |   |   |   |   |   |   |    |    |    |                                                                  |

| התיאור ההיסטורי                                                                    | פרטי הדיווח                                                                               |
|------------------------------------------------------------------------------------|-------------------------------------------------------------------------------------------|
|  | <p><b>בנין מגורים על הר הזיתים</b><br/>         (American colony photographers, 1927)</p> |

|                              |   |   |   |   |   |   |   |   |    |    |    |                                                                  |
|------------------------------|---|---|---|---|---|---|---|---|----|----|----|------------------------------------------------------------------|
| 1                            | 2 | 3 | 4 | 5 | 6 | 7 | 8 | 9 | 10 | 11 | 12 | אנא סמן מהי לדעתך דרגת עוצמת רעידת האדמה של האירוע המתואר בתמונה |
| אנא ציין מדוע בחרת בדרגה זו? |   |   |   |   |   |   |   |   |    |    |    |                                                                  |

מקרה 9:

| פרטי הדיווח                                           | התיאור ההיסטורי                                                                                                                                                          |
|-------------------------------------------------------|--------------------------------------------------------------------------------------------------------------------------------------------------------------------------|
| צריח מגדל דוד, ירושלים<br>(New York times 14.11.1927) | "קצה הצריח במגדל דוד נשבר ואבנים זזו ממקומן במגדל השני"<br><br>The top of the minaret at David's Tower was broken off and some stones were displaced in the other tower. |

|                              |   |   |   |   |   |   |   |   |    |    |    |                                                                  |
|------------------------------|---|---|---|---|---|---|---|---|----|----|----|------------------------------------------------------------------|
| 1                            | 2 | 3 | 4 | 5 | 6 | 7 | 8 | 9 | 10 | 11 | 12 | אנא סמן מהי לדעתך דרגת עוצמת רעידת האדמה של האירוע המתואר בתמונה |
| אנא ציין מדוע בחרת בדרגה זו? |   |   |   |   |   |   |   |   |    |    |    |                                                                  |

מקרה 10:

| פרטי הדיווח                            | התיאור ההיסטורי                                                                                                                                                                                                                                                                                    |
|----------------------------------------|----------------------------------------------------------------------------------------------------------------------------------------------------------------------------------------------------------------------------------------------------------------------------------------------------|
| גשר אלנבי (New York Times, 13.11.1927) | <p>"גשר אלנבי ניזוק בשני קצותיו. הכנסייה היוונית של כנסיית הקבר הוכרזה כלא בטיחותית בשל הסדקים בקירות"</p> <p><b>The Allenby Bridge was damaged at both ends. The Greek Catholic Church of the Holy Sepulchre has been declared unsafe because of the cracks in the walls. The roof of the</b></p> |

|                              |   |   |   |   |   |   |   |   |    |    |    |                                                                  |
|------------------------------|---|---|---|---|---|---|---|---|----|----|----|------------------------------------------------------------------|
| 1                            | 2 | 3 | 4 | 5 | 6 | 7 | 8 | 9 | 10 | 11 | 12 | אנא סמן מהי לדעתך דרגת עוצמת רעידת האדמה של האירוע המתואר בתמונה |
| אנא ציין מדוע בחרת בדרגה זו? |   |   |   |   |   |   |   |   |    |    |    |                                                                  |
