# Supplementary material
Source: MDPI journal article supplement (https://www.mdpi.com/2306-5729/8/6/108)
Supplement: s1 [file s1]

Archive with 4 entries (4 files):
- data-2346121-supplementary/SuppS1.pdf
- data-2346121-supplementary/SuppS2.pdf
- data-2346121-supplementary/SuppS3.pdf
- data-2346121-supplementary/SuppS4.pdf
